# Supplementary material for: Simultaneous learning of instantaneous and time-delayed genetic interactions using novel information theoretic scoring technique
Source: PubMed Central journal article supplement (PMC3529704; doi:10.1186/1752-0509-6-62), 2012-06-12

Comparison of performance with 3 other methods for the 10-gene synthetic network. Red(+)-Proposed, Green(o)-Banjo, Blue(x)-BNFinder+BDe, Cyan (square)-BNFinder+MDL, Magenta(diamond)-TDARACNE

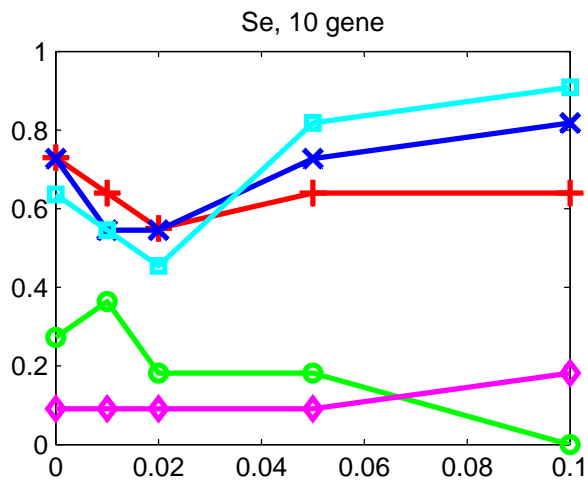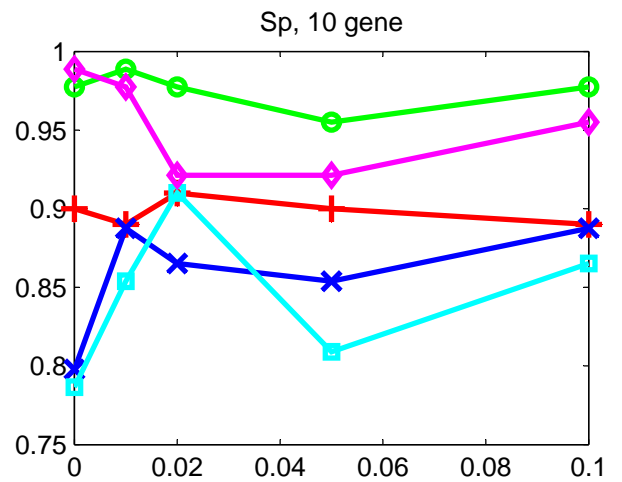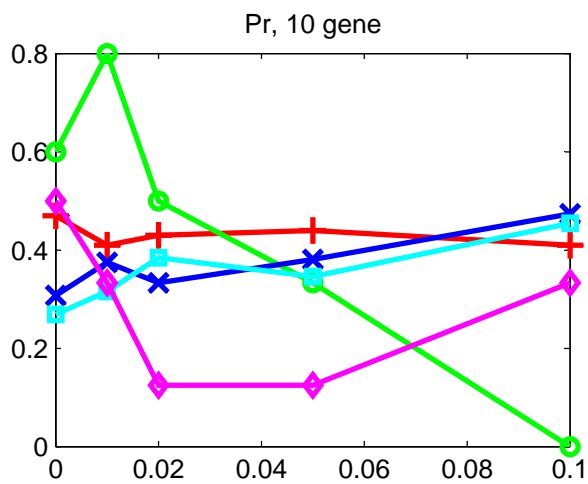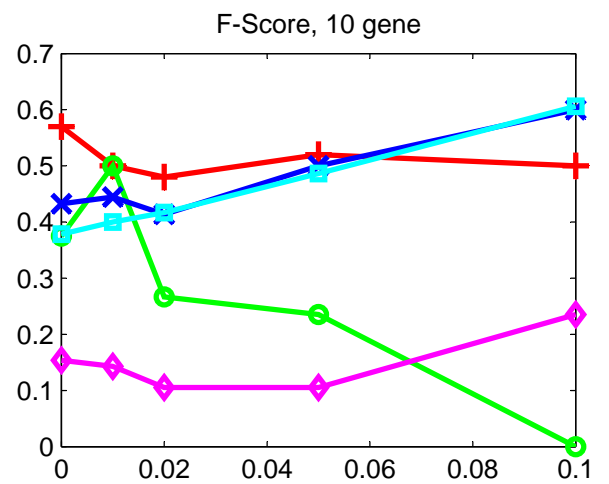

Comparison of performance with 3 other methods for the 25-gene synthetic network. Red(+)-Proposed, Green(o)-Banjo, Blue(x)-BNFinder+BDe, Cyan (square)-BNFinder+MDL, Magenta(diamond)-TDARACNE

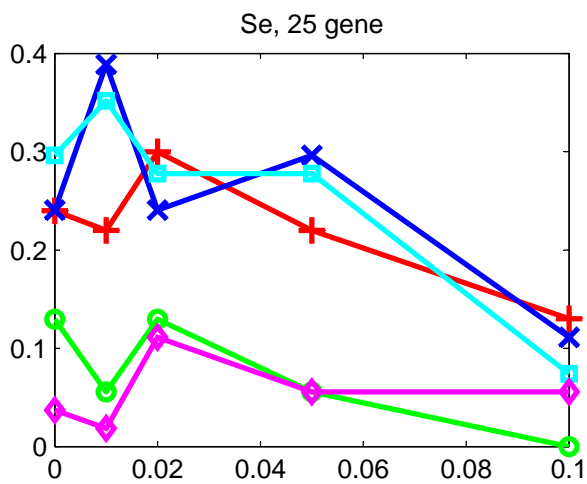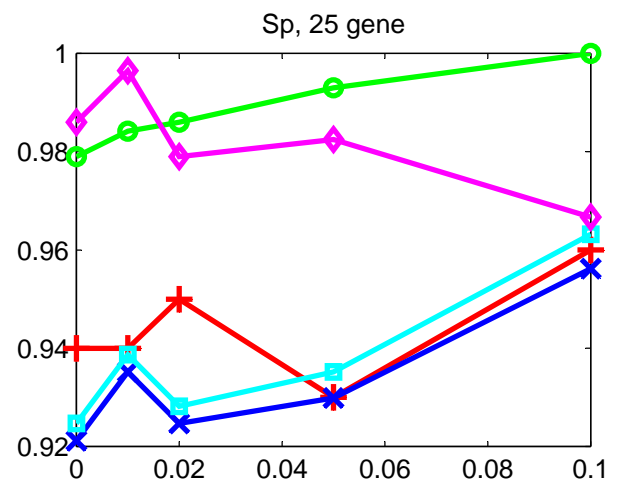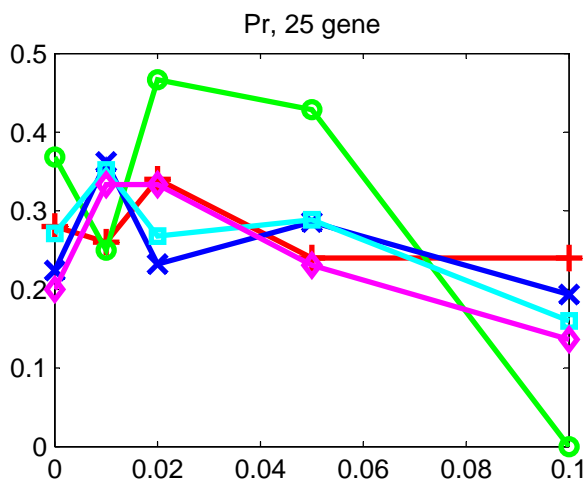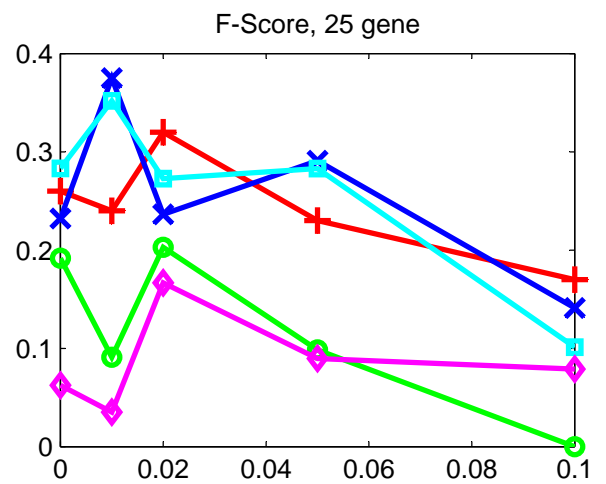

Comparison of performance with 3 other methods for the 50-gene synthetic network. Red(+)-Proposed, Green(o)-Banjo, Blue(x)-BNFinder+BDe, Cyan (square)-BNFinder+MDL, Magenta(diamond)-TDARACNE

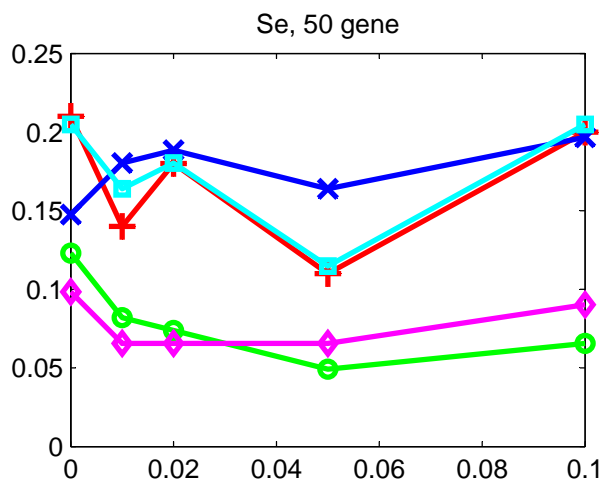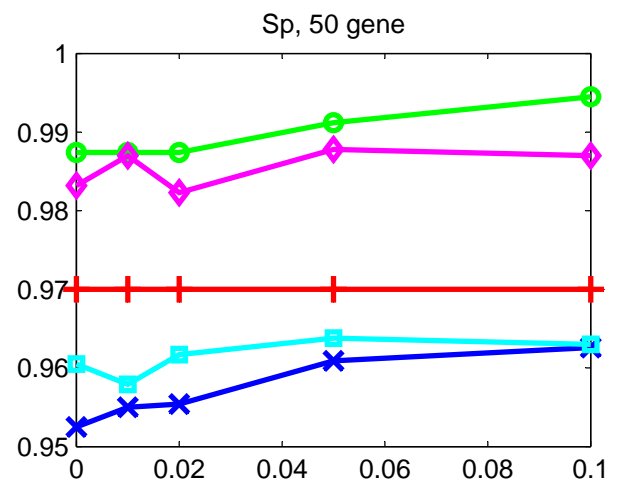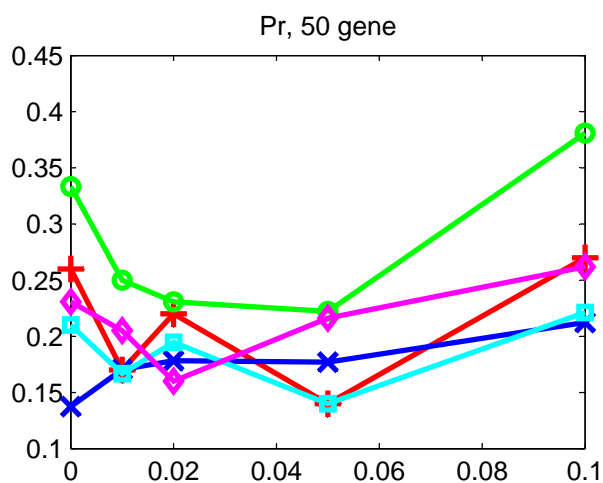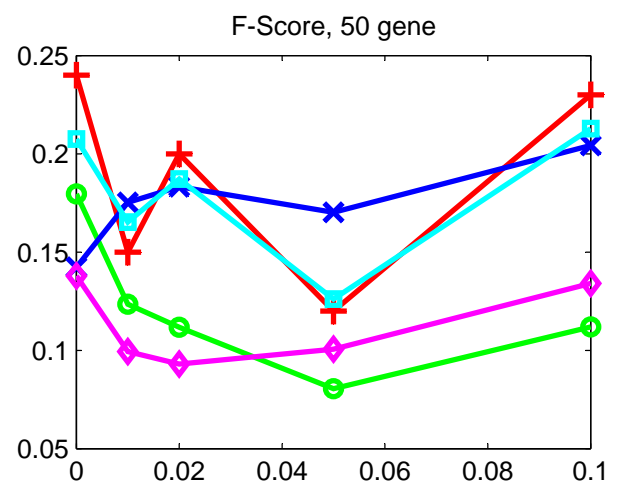

Supplement: 1752-0509-6-62-S1.pdf [file 1752-0509-6-62-S1.pdf]
