# Supplementary material for: Simultaneous learning of instantaneous and time-delayed genetic interactions using novel information theoretic scoring technique
Source: PubMed Central journal article supplement (PMC3529704; doi:10.1186/1752-0509-6-62), 2012-06-12

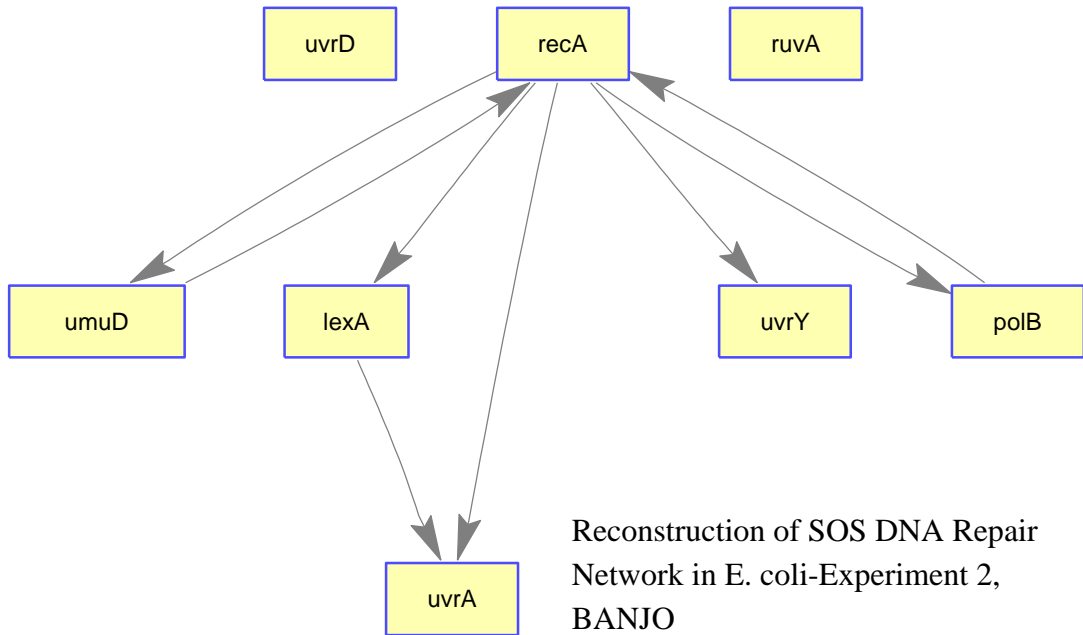

Reconstruction of SOS DNA  
Repair Network in *E. coli*-  
Experiment 3, BANJO

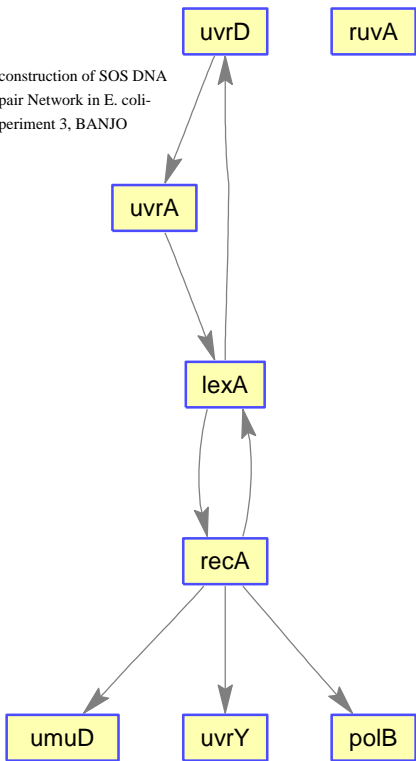

# Reconstruction of SOS DNA Repair

Network in *E. coli*-Experiment 4, BANJO

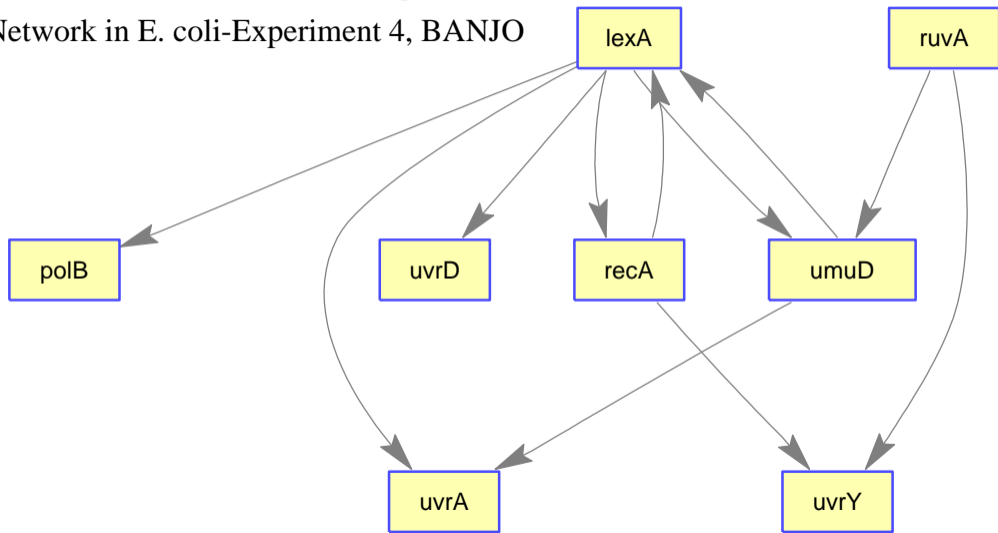

Supplement: 1752-0509-6-62-S2.pdf [file 1752-0509-6-62-S2.pdf]
