# Supplementary material for: Simultaneous learning of instantaneous and time-delayed genetic interactions using novel information theoretic scoring technique
Source: PubMed Central journal article supplement (PMC3529704; doi:10.1186/1752-0509-6-62), 2012-06-12

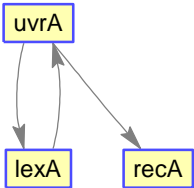

Reconstruction of SOS  
DNA Repair Network in  
E. coli-Experiment 2,  
BNFinder+MDL

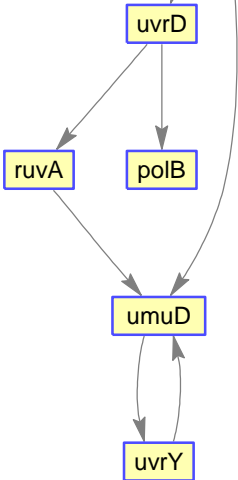

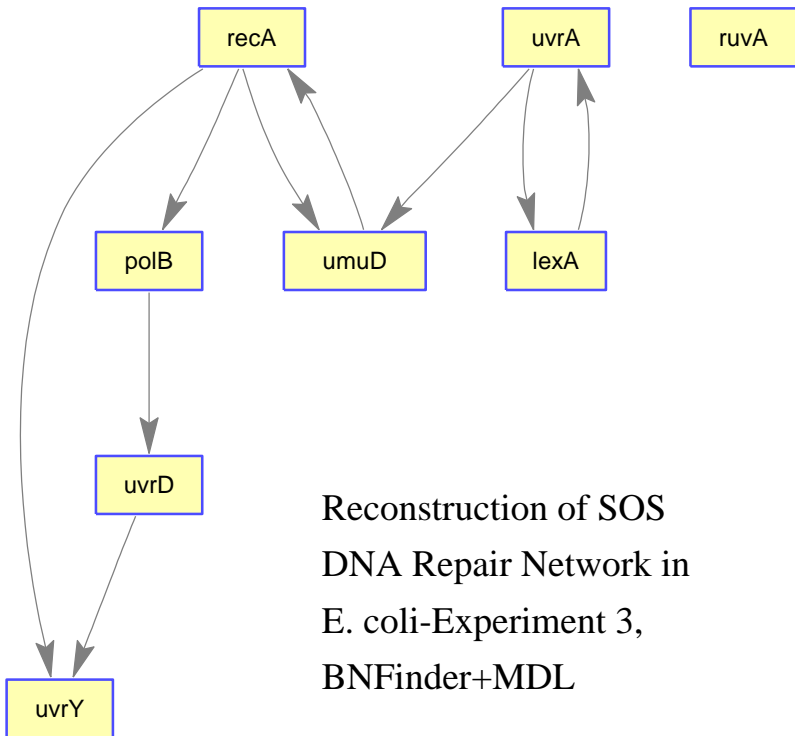

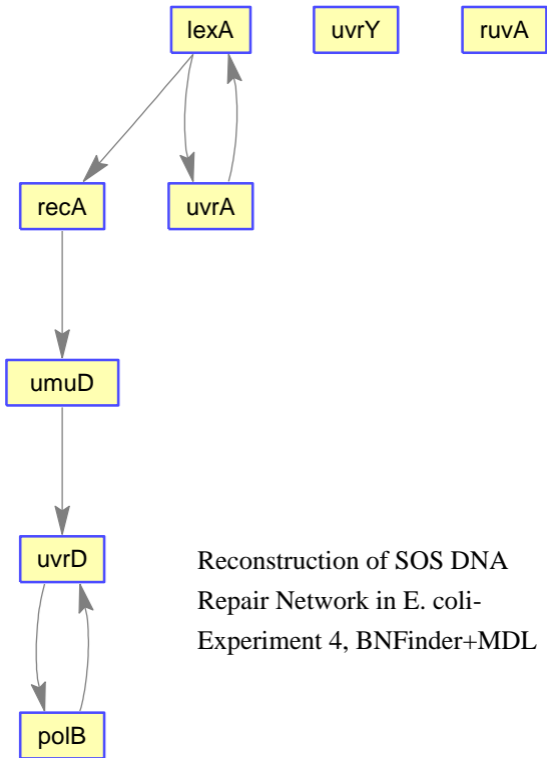

Supplement: 1752-0509-6-62-S4.pdf [file 1752-0509-6-62-S4.pdf]
