# Supplementary material for: Simultaneous learning of instantaneous and time-delayed genetic interactions using novel information theoretic scoring technique
Source: Springer Nature journal article supplement (doi:10.1186/1752-0509-6-62), 2012-01-01

Reconstruction of SOS  
DNA Repair Network in  
*E. coli*-Experiment 2,  
BNFinder+BDe

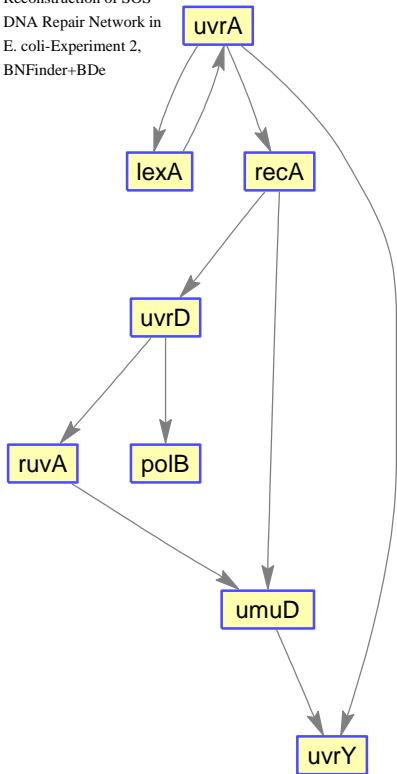

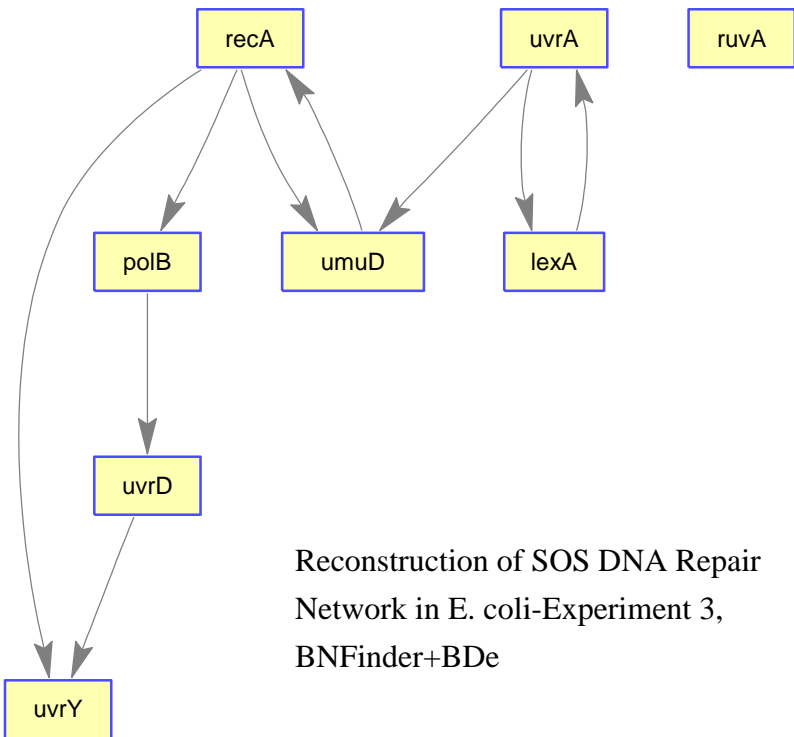

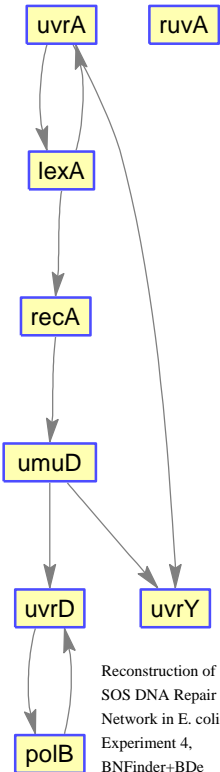

Supplement: 12918_2011_1010_MOESM3_ESM.pdf [file 12918_2011_1010_MOESM3_ESM.pdf]
