# Supplementary material for: Simultaneous learning of instantaneous and time-delayed genetic interactions using novel information theoretic scoring technique
Source: Springer Nature journal article supplement (doi:10.1186/1752-0509-6-62), 2012-01-01

(DNA Damage)

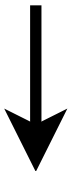

recA

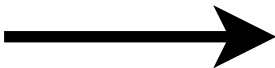

recA\*

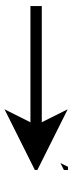

lexA

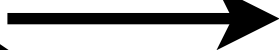

(Cleavage)

umuD

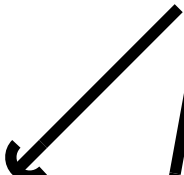

ruvA

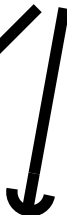

uvrA

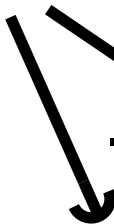

....

recA

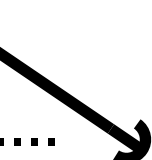

Supplement: 12918_2011_1010_MOESM28_ESM.pdf [file 12918_2011_1010_MOESM28_ESM.pdf]
